# Supplementary material for: Consensus and pool profiles to assist in the analysis and interpretation of complex low template DNA mixtures
Source: PubMed Central journal article supplement — Int J Legal Med. 2011 Dec 1;127(1):11–23. doi: 10.1007/s00414-011-0647-5 (PMC3538021; doi:10.1007/s00414-011-0647-5), 2011-12-01
Supplement: 414_2011_647_MOESM1_ESM.pdf [file 414_2011_647_MOESM1_ESM.pdf]

Supplementary Table 1

Number and position of drop-in alleles in individual profiles, n=4 x=2 consensus profiles and pool-profiles of a blend of 4 amplifications obtained from mimicked strangulation mixtures (contact traces); A) 4  $\mu$ l PCR input, standard 3 kV 15s CE, B) 4  $\mu$ l PCR input, increased 9 kV 10s CE, C) 10  $\mu$ l PCR input, standard 3 kV 15s CE, B) 10  $\mu$ l PCR input, increased 9 kV 10s CE injection settings.

| <b>A</b>            | 4 $\mu$ l PCR input<br>standard CE   | # of<br>profiles | Total #<br>of drop-<br>ins | Drop-in position         |                             |                         |                |
|---------------------|--------------------------------------|------------------|----------------------------|--------------------------|-----------------------------|-------------------------|----------------|
|                     |                                      |                  |                            | Back<br>(-1 repeat unit) | Forward<br>(+1 repeat unit) | Between<br>true alleles | Un-<br>related |
| Individual profiles | 16                                   | 16               | 8                          | 3                        | 1                           | 1                       | 3              |
| Consensus profiles  | 4                                    | 4                | 0                          | 0                        | 0                           | 0                       | 0              |
| Pool-profiles       | 4                                    | 4                | 0                          | 0                        | 0                           | 0                       | 0              |
| <b>B</b>            | 4 $\mu$ l PCR input<br>increased CE  | # of<br>profiles | Total #<br>of drop-<br>ins | Drop-in position         |                             |                         |                |
|                     |                                      |                  |                            | Back<br>(-1 repeat unit) | Forward<br>(+1 repeat unit) | Between<br>true alleles | Un-<br>related |
| Individual profiles | 16                                   | 16               | 46                         | 13                       | 17                          | 3                       | 13             |
| Consensus profiles  | 4                                    | 4                | 7                          | 3                        | 3                           | 1                       | 0              |
| Pool-profiles       | 4                                    | 4                | 6                          | 1                        | 4                           | 0                       | 1              |
| <b>C</b>            | 10 $\mu$ l PCR input<br>standard CE  | # of<br>profiles | Total #<br>of drop-<br>ins | Drop-in position         |                             |                         |                |
|                     |                                      |                  |                            | Back<br>(-1 repeat unit) | Forward<br>(+1 repeat unit) | Between<br>true alleles | Un-<br>related |
| Individual profiles | 16                                   | 16               | 33                         | 6                        | 15                          | 7                       | 5              |
| Consensus profiles  | 4                                    | 4                | 7                          | 1                        | 3                           | 2                       | 1              |
| Pool-profiles       | 4                                    | 4                | 2                          | 0                        | 1                           | 1                       | 0              |
| <b>D</b>            | 10 $\mu$ l PCR input<br>increased CE | # of<br>profiles | Total #<br>of drop-<br>ins | Drop-in position         |                             |                         |                |
|                     |                                      |                  |                            | Back<br>(-1 repeat unit) | Forward<br>(+1 repeat unit) | Between<br>true alleles | Un-<br>related |
| Individual profiles | 16                                   | 16               | 82                         | 23                       | 32                          | 8                       | 19             |
| Consensus profiles  | 4                                    | 4                | 20                         | 7                        | 8                           | 2                       | 3              |
| Pool-profiles       | 4                                    | 4                | 12                         | 4                        | 5                           | 1                       | 2              |
