# Supplementary material for: Consensus and pool profiles to assist in the analysis and interpretation of complex low template DNA mixtures
Source: PubMed Central journal article supplement — Int J Legal Med. 2011 Dec 1;127(1):11–23. doi: 10.1007/s00414-011-0647-5 (PMC3538021; doi:10.1007/s00414-011-0647-5), 2011-12-01
Supplement: 414_2011_647_MOESM2_ESM.pdf [file 414_2011_647_MOESM2_ESM.pdf]

Supplementary Table 2

Estimated number of contributors for STR profiles obtained from mimicked strangulation mixtures (contact traces between 2 volunteers) at varying PCR input and CE settings (standard 3 kV 15s and increased 9 kV 10s injection). Estimates were obtained using the maximum likelihood estimator.

|                              | Estimated # of contributors |                     |               |                      |              |                     |               |                      |              |                     |               |                      |
|------------------------------|-----------------------------|---------------------|---------------|----------------------|--------------|---------------------|---------------|----------------------|--------------|---------------------|---------------|----------------------|
|                              | 1                           |                     |               |                      | 2            |                     |               |                      | 3            |                     |               |                      |
|                              | 4μl<br>input                | 4μl<br>input<br>9kV | 10μl<br>input | 10μl<br>input<br>9kV | 4μl<br>input | 4μl<br>input<br>9kV | 10μl<br>input | 10μl<br>input<br>9kV | 4μl<br>input | 4μl<br>input<br>9kV | 10μl<br>input | 10μl<br>input<br>9kV |
| Individual profiles          | 6%                          | 0%                  | 0%            | 0%                   | 94%          | 75%                 | 75%           | 38%                  | 0%           | 25%                 | 25%           | 63%                  |
| Consensus profiles (n=4 x=2) | 0%                          | 0%                  | 0%            | 0%                   | 100%         | 75%                 | 50%           | 0%                   | 0%           | 25%                 | 50%           | 100%                 |
| Pool-profiles (blend of 4)   | 0%                          | 0%                  | 0%            | 0%                   | 100%         | 100%                | 100%          | 75%                  | 0%           | 0%                  | 0%            | 25%                  |
